# Supplementary material for: Genome-Wide Association Study (GWAS) of Mesocotyl Length for Direct Seeding in Rice
Source: MDPI journal article supplement (doi:10.3390/agronomy11122527), 2021-12-13
Supplement: s1 [file s1]

## Supplementary Materials

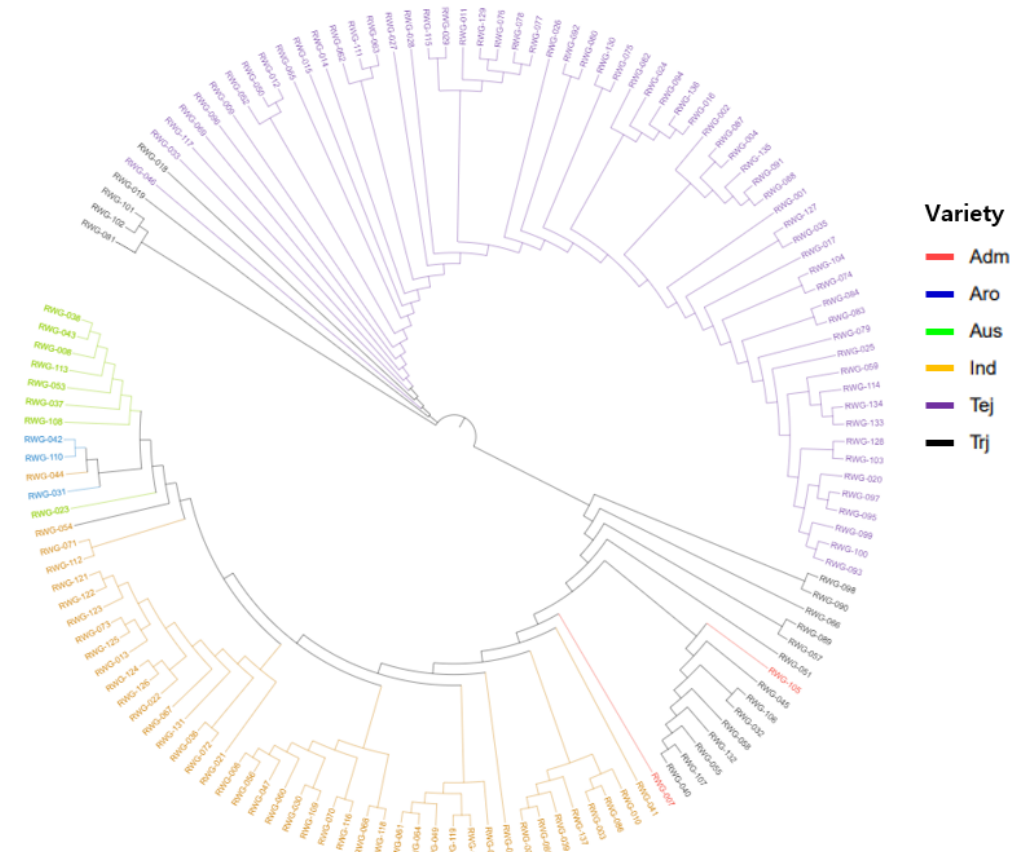

**Figure S1.** Principal Component Analysis (PCA) (PC1 and PC2). red, blue, green, orange, purple, and black represent the admixture, aromatic, indica, temperate japonica and tropical japonica rice subspecies, respectively. Adm: admixture, Aro: aromatic, Ind: indica, Tej: temperate japonica, Trj: tropical japonica.

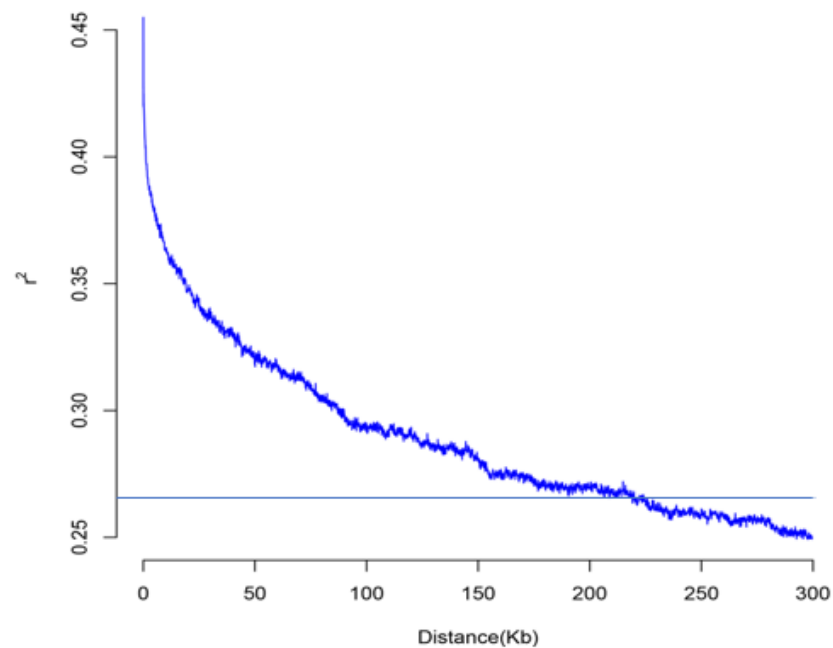

**Figure S2.** Linkage disequilibrium decay analysis.

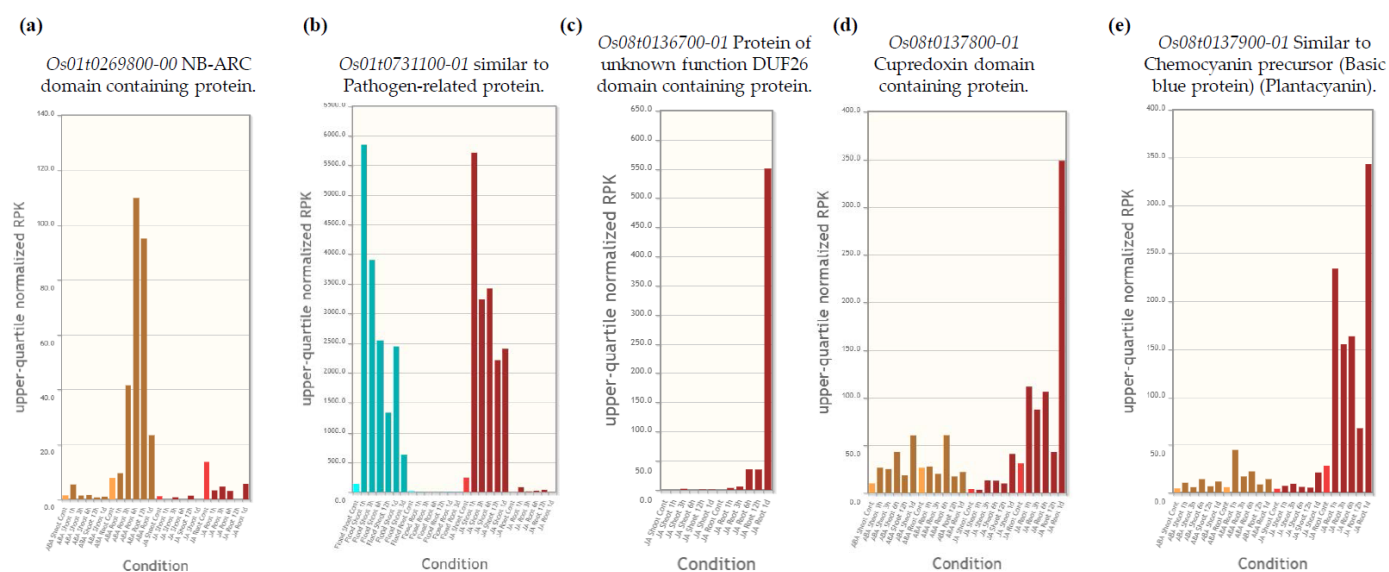

**Figure S3.** Expression profiles in rice seedling under the various environmental conditions. (a) Expression profile of *Os01g0269800*; (b) Expression profile of *Os01g0731100*; (c) Expression profile of *Os08g0136700*; (d) Expression profile of *Os08g0137800*; (e) Expression profile of *Os08g0137800*. RPK: reads per kilobase.
